# Supplementary material for: Anti-leukemic effects of the V-ATPase inhibitor Archazolid A
Source: PubMed Central journal article supplement (PMC4791247; doi:10.18632/oncotarget.6180), 2015-10-19
Supplement: oncotarget-06-43508-s001.pdf [file oncotarget-06-43508-s001.pdf]

# Anti-leukemic effects of the V-ATPase inhibitor Archazolid A

## Supplementary Material

### Supplementary Figure 1

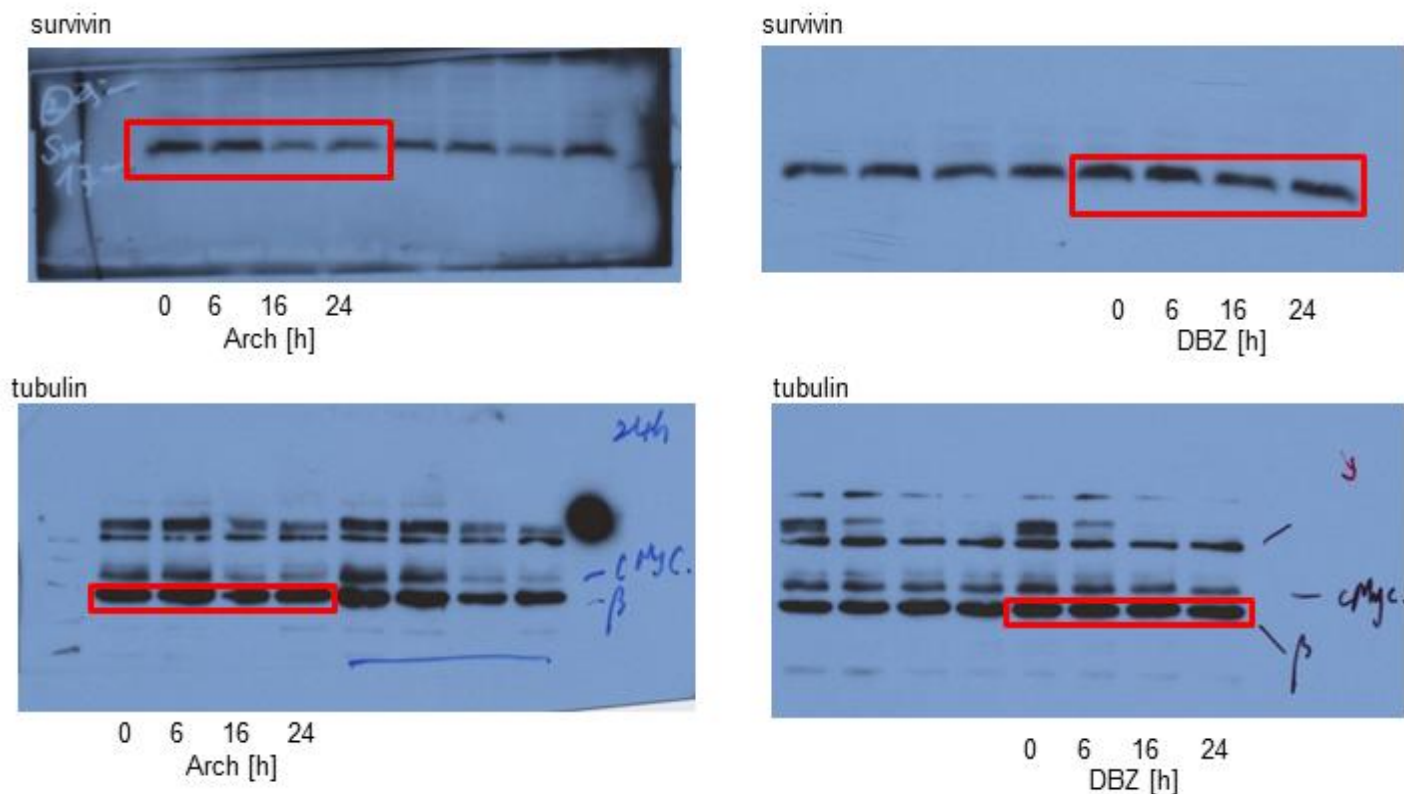

**Full blots related to Fig. 8A are shown.** Immunoblots from Jurkat cells treated with Archazolid A (Arch, 10 nM, 24h, left panel) or DBZ (50  $\mu$ M, 24h, right panel) and probed with antibodies for survivin are shown. Immunoblots for tubulin indicate equal loading.

Supplementary Table 1: RT-PCR Primers used for V-ATPase subunits

| Gene Name |         | Sequence (5'→3')          |
|-----------|---------|---------------------------|
| ATP6V1A   | Forward | GATGTCTGAAGTCCTCCGGG      |
|           | Reverse | TGGCTACCAAAGCTGTCTCTC     |
| ATP6V1B1  | Forward | ACAGATCCCCATCCTCACCA      |
|           | Reverse | TGTGAAGCTGTCTGTCCACG      |
| ATP6V1B2  | Forward | CCAGGAAGGATCATGCCGAT      |
|           | Reverse | GGGCTTCTTCTCCAACGACA      |
| ATP6V1C1  | Forward | GCATGCGGCAACTCAAAGA       |
|           | Reverse | GCCAACCAAGACATCCAACG      |
| ATP6V1C2  | Forward | GGAAACTCGACACCTTTGCTG     |
|           | Reverse | AAGTCAACTCCGTTTGCCAG      |
| ATP6V1D   | Forward | CGCAAGTGAAGATTCGAGCG      |
|           | Reverse | TTCCCACTCTGGCTAAAC        |
| ATP6V1E1  | Forward | TTCCCTCTGGTAAAGGCTGC      |
|           | Reverse | CAGCTATGTCTTCAGGCAGGT     |
| ATP6V1E2  | Forward | AGAGGCATACCTGGCTGTGA      |
|           | Reverse | GAGATCCAGTCGGCTTTCCA      |
| ATP6V1F   | Forward | CCTCATCAACCAGTACATCGCA    |
|           | Reverse | CGTCATATGGGTGCTCCTTGG     |
| ATP6V1G1  | Forward | GGCTAGTCAGTCTCAGGGGA      |
|           | Reverse | CCGGTCTTTCTTTTGCGGG       |
| ATP6V1G2  | Forward | AGCAGAGAAACCGAGAGCG       |
|           | Reverse | GGCAGAAATCCGGTAGTTGGG     |
| ATP6V1G3  | Forward | GCCAAGGAGGAAGCAATGGT      |
|           | Reverse | TCTGAGAGCCCATTATCTTAGATTG |
| ATP6V1H   | Forward | TGCAAACAAAGTCAACTGGCA     |
|           | Reverse | GCTTCTTTCAGGGCTTCGT       |
| ATP6V0A1  | Forward | ATGGACACCGGTGAAAACCC      |
|           | Reverse | CAGAGCTTCTGGTTTGTGTTG     |
| ATP6V0A2  | Forward | CTGGGATTTGTGTCTGGCCT      |
|           | Reverse | CACGATGGTGTACCCTTTGC      |
| ATP6V0A3  | Forward | CCTACACCTGCGTGAGTCG       |
|           | Reverse | AACCACAAAGCGTCTCTGGA      |
| ATP6V0A4  | Forward | TGACCGAAAGTTGGGGTTC       |
|           | Reverse | AGTACACGTTTCTCGGCAG       |
| ATP6V0B   | Forward | ACTTCGCCCTTCATGTGGTC      |
|           | Reverse | CAATGATGGAGGAGCCGGTAA     |
| ATP6V0C   | Forward | ATGCTTCGTTTTTCGCCGTC      |
|           | Reverse | ATGACAGACATGGCCGCAA       |
| ATP6V0D1  | Forward | AGATCATCCGCAACACCCTC      |
|           | Reverse | CACATGGCATCAGCCGTAGT      |
| ATP6V0D2  | Forward | CCAGATGAAGAACGTAGCGGA     |
|           | Reverse | ACGCTCGTAAAACACGTCCT      |
| ATP6V0E1  | Forward | GGTGCCTTGGTTCATCCCTAA     |
|           | Reverse | GGTTGAGTTGGGCCAGAATTG     |
| ATP6V0E2  | Forward | CATTCGCCCTCCCGGTCAT       |
|           | Reverse | TCACTCCGCGGTTGGGTC        |
